# Supplementary material
Source: Springer Nature journal article supplement (https://www.springermedizin.de/resource/supplementary/12958_2012_983_MOESM5_ESM.pdf/9566560)
Supplement: MOESM5 [file 9566560]

| 1 | SCOS |   |   | arrest at spermatogonium |   |   | arrest at primary spermatocyte |   |    | arrest at spermatid |    |    | cryptorchidism |    |    | normal |    |    |
|---|------|---|---|--------------------------|---|---|--------------------------------|---|----|---------------------|----|----|----------------|----|----|--------|----|----|
|   | 2    | 3 | 4 | 5                        | 6 | 7 | 8                              | 9 | 10 | 11                  | 12 | 13 | 14             | 15 | 16 | 17     | 18 | 19 |

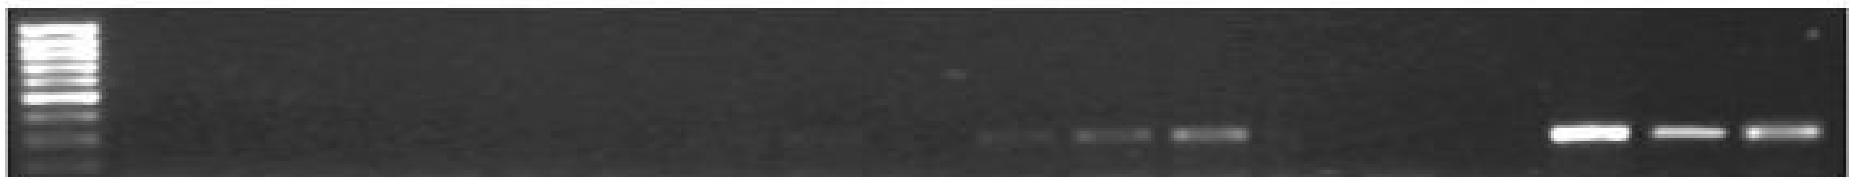

**DKKL1**

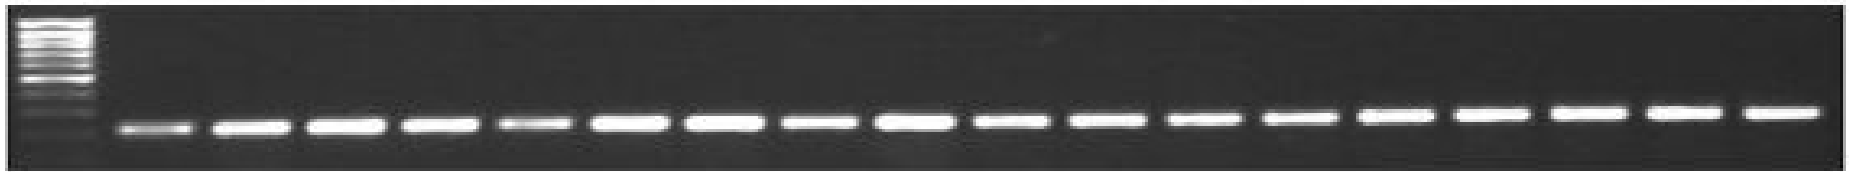

**GAPDH**
